# Supplementary material
Source: MDPI journal article supplement (https://www.mdpi.com/2311-5637/9/3/260)
Supplement: s1 [file s1 › fermentation-2222306-supplementary.pdf]

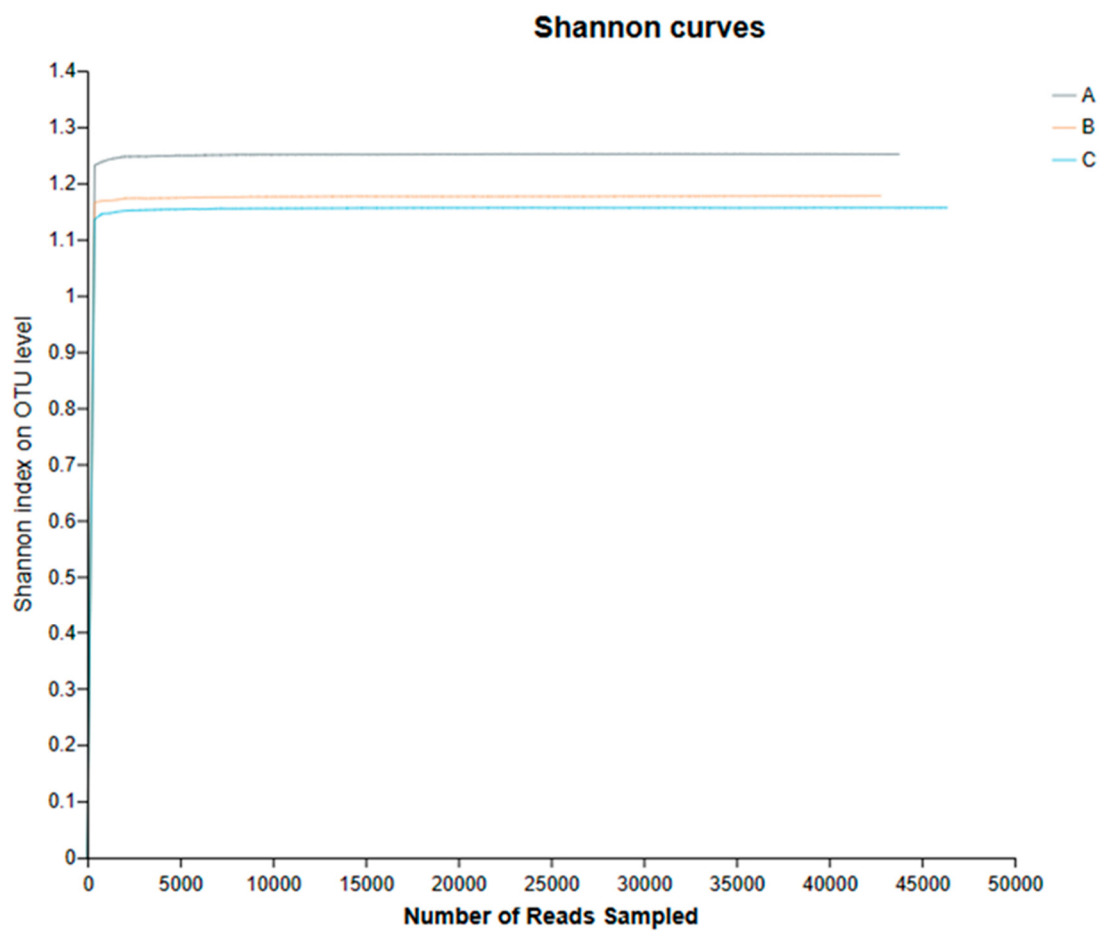

Figure S1. Shannon dilution curve of bacterial OTU levels in fermented grains samples.

Note: the abscissa represents the amount of sequencing data randomly sampled, the ordinate represents the Shannon index.

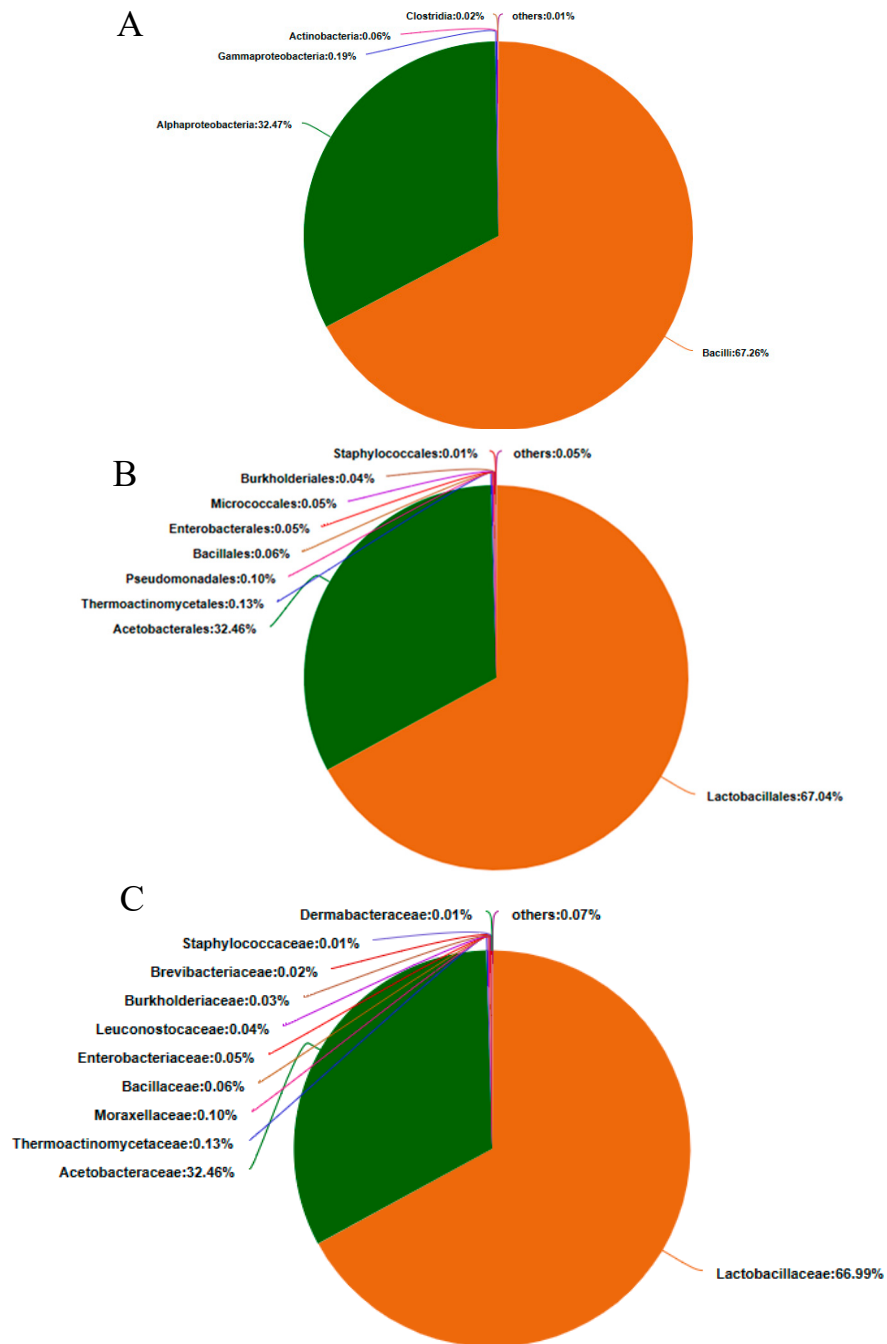

Figure S2. Bacterial community composition of fermented grains samples. (A) Class level  
(B) Order level (C) Family level

Note: Relative abundances given in the figure were based on mean three replicates.
